# Supplementary material for: The Role of Age Variables in Family Language Policy
Source: MDPI journal article supplement (doi:10.3390/languages9040139), 2024-04-12
Supplement: s1 [file s1]

## Supplementary Material

Article Title: The Role of Age Variables in Family Language Policy

Journal Name: Special Issues of Languages

**Table S1**

*Overview of Family Language Policy (All Participants)*

|                                                               | Rating ( $n = 82$ ) |           |                   |           |
|---------------------------------------------------------------|---------------------|-----------|-------------------|-----------|
|                                                               | <i>M</i>            | <i>SD</i> |                   |           |
| Ideology (Parent Questionnaire)                               |                     |           |                   |           |
| Benefits of bilingualism                                      |                     |           |                   |           |
| Cognitive                                                     | 4.63                | .66       |                   |           |
| Economic                                                      | 4.67                | .57       |                   |           |
| Social                                                        | 4.73                | .65       |                   |           |
|                                                               | English             |           | Hebrew            |           |
|                                                               | <i>M</i>            | <i>SD</i> | <i>M</i>          | <i>SD</i> |
| Language status                                               |                     |           |                   |           |
| Parent opinion                                                | 4.95                | .22       | 4.93              | .26       |
| Community opinion                                             | 4.45                | .79       | 4.88              | .43       |
| Israel opinion                                                | 4.59                | .59       | 4.98              | .16       |
| World opinion                                                 | 4.80                | .48       | 2.51              | 1.17      |
| Language as connection                                        |                     |           |                   |           |
| Parents                                                       | 4.74                | .56       | 2.34              | 1.34      |
| Siblings                                                      | 4.31 <sup>c</sup>   | 1.09      | 2.75 <sup>a</sup> | 1.24      |
| Other family members                                          | 4.89                | .39       | 2.91 <sup>b</sup> | 1.52      |
| Friends                                                       | 3.70                | 1.24      | 4.79              | .49       |
| Community members                                             | 2.74                | 1.37      | 4.87              | .38       |
| Language as culture                                           |                     |           |                   |           |
| Child sense of belonging                                      | 2.85                | 1.22      | 4.68              | .65       |
| Child knowledge                                               | 2.74                | 1.10      | 4.88              | .37       |
| Child attachment                                              | 2.45                | 1.03      | 4.82              | .48       |
| Child pride                                                   | 2.43                | 1.03      | 4.85              | .39       |
| Language as capital                                           |                     |           |                   |           |
| For School                                                    | 4.24                | .79       | 4.94              | .36       |
| For University                                                | 4.57                | .63       | 4.87              | .47       |
| For Employment                                                | 4.48                | .63       | 4.74              | .64       |
| Management (Parent Questionnaire)                             |                     |           |                   |           |
|                                                               | <i>M</i>            | <i>SD</i> |                   |           |
| Introducing Languages                                         |                     |           |                   |           |
| Both at home together                                         | 2.17                | 1.39      |                   |           |
| English at home; Hebrew out of the home                       | 4.43                | 1.16      |                   |           |
| English at home, then Hebrew at home                          | 1.85                | 1.21      |                   |           |
| One parent one language                                       | 1.57                | 1.20      |                   |           |
| Interaction strategies adopted if child speaks Hebrew at home |                     |           |                   |           |
| Child to repeat in English                                    | 2.02                | 1.31      |                   |           |
| Pretend not to understand                                     | 1.44                | .89       |                   |           |
| Request clarification in English                              | 1.94                | 1.22      |                   |           |
| Repeat back to child in English                               | 2.35                | 1.53      |                   |           |
| Keep talking                                                  | 2.89                | 1.57      |                   |           |

|                                                                 |                   |           |                   |           |
|-----------------------------------------------------------------|-------------------|-----------|-------------------|-----------|
| Talk in Hebrew                                                  | 1.61              | .99       |                   |           |
| Promoting language strategies                                   |                   |           |                   |           |
|                                                                 | English           |           | Hebrew            |           |
|                                                                 | <i>M</i>          | <i>SD</i> | <i>M</i>          | <i>SD</i> |
| With siblings                                                   | 2.95 <sup>a</sup> | 1.47      | 1.70 <sup>a</sup> | .94       |
| With friends                                                    | 2.00              | .89       | 3.41              | 1.35      |
| With family not living at home                                  | 3.79 <sup>c</sup> | 1.49      | 1.97 <sup>d</sup> | 1.24      |
| Television                                                      | 2.56              | 1.33      | 2.48 <sup>a</sup> | 1.27      |
| Practice (Parent Questionnaire)                                 |                   |           |                   |           |
| Home language use                                               |                   |           |                   |           |
| Both parents speak                                              | 4.70 <sup>a</sup> | .75       | 1.93              | .98       |
| Everyone speaks                                                 | 4.46 <sup>a</sup> | .92       | 2.05              | 1.14      |
| Child speaks                                                    | 4.59 <sup>a</sup> | .74       | 2.41              | 1.19      |
| Child speaks with parent/s                                      | 4.48 <sup>a</sup> | .83       | 1.85              | .96       |
| Practice (Child Questionnaire)                                  |                   |           |                   |           |
| Home language use                                               |                   |           |                   |           |
| Both parents speak                                              | 4.52              | .72       | 1.96 <sup>b</sup> | .91       |
| Everyone speaks                                                 | 4.35              | .91       | 1.84 <sup>b</sup> | .90       |
| I speak                                                         | 4.27 <sup>b</sup> | .89       | 2.24 <sup>b</sup> | .82       |
| I speak with parent/s                                           | 4.39 <sup>b</sup> | .91       | 1.77 <sup>b</sup> | .80       |
| Promoting language strategies                                   |                   |           |                   |           |
| With siblings                                                   | 4.15 <sup>c</sup> | 1.07      | 2.13 <sup>b</sup> | 1.07      |
| With friends                                                    | 3.07              | 1.18      | 3.40              | 1.20      |
| With family not living at home                                  | 4.09 <sup>a</sup> | 1.26      | 2.20              | 1.21      |
| Television                                                      | 4.39              | 1.12      | 2.12              | 1.17      |
|                                                                 | <i>M</i>          | <i>SD</i> |                   |           |
| Introducing languages                                           |                   |           |                   |           |
| Both at home together                                           | 2.39 <sup>d</sup> | 1.64      |                   |           |
| English at home; Hebrew out of the home                         | 4.22 <sup>e</sup> | 1.47      |                   |           |
| English at home, then Hebrew at home                            | 1.77 <sup>e</sup> | 1.45      |                   |           |
| One parent one language                                         | 1.70              | 1.35      |                   |           |
| Interaction strategies parent/s adopt if I speak Hebrew at home |                   |           |                   |           |
| Asked to repeat in English                                      | 1.96              | 1.27      |                   |           |
| Parent pretends not to understand                               | 1.17 <sup>a</sup> | .57       |                   |           |
| Parent requests clarification in English                        | 1.73 <sup>a</sup> | 1.22      |                   |           |
| Parent repeats in English                                       | 1.99              | 1.22      |                   |           |
| Parent keeps talking                                            | 3.26 <sup>a</sup> | 1.63      |                   |           |
| Parent talks in Hebrew                                          | 1.99 <sup>c</sup> | 1.14      |                   |           |

*Note.* Likert Scale (1= *not at all*, 5 = *very much*).

<sup>a</sup>*n* = 81; <sup>b</sup>*n* = 79; <sup>c</sup>*n* = 80; <sup>d</sup>*n* = 77; <sup>e</sup>*n* = 78

**Table S2***Chronological Age as a Categorical Variable: Overview of FLP*

|                                 | Preschool<br>(Age 5;1- 6;8)<br><i>n</i> = 36 |           | Primary School<br>(Age 9;0 – 10; 6)<br><i>n</i> = 25 |           | Secondary School<br>(Age 13;1 – 14;1)<br><i>n</i> = 21 |           |
|---------------------------------|----------------------------------------------|-----------|------------------------------------------------------|-----------|--------------------------------------------------------|-----------|
|                                 | <i>M</i>                                     | <i>SD</i> | <i>M</i>                                             | <i>SD</i> | <i>M</i>                                               | <i>SD</i> |
| Ideology (Parent Questionnaire) |                                              |           |                                                      |           |                                                        |           |
| Benefits of bilingualism        |                                              |           |                                                      |           |                                                        |           |
| Cognitive                       | 4.69                                         | .58       | 4.64                                                 | .70       | 4.52                                                   | .75       |
| Economic                        | 4.69                                         | .58       | 4.68                                                 | .63       | 4.62                                                   | .50       |
| Social                          | 4.78                                         | .54       | 4.76                                                 | .72       | 4.62                                                   | .74       |
| Pro English                     |                                              |           |                                                      |           |                                                        |           |
| Language status                 |                                              |           |                                                      |           |                                                        |           |
| Parent opinion                  | 4.92                                         | .28       | 4.96                                                 | .20       | 5.00                                                   | .00       |
| Community opinion               | 4.22                                         | .90       | 4.68                                                 | .63       | 4.57                                                   | .68       |
| Israel opinion                  | 4.39                                         | .549      | 4.84                                                 | .37       | 4.62                                                   | .74       |
| World opinion                   | 4.67                                         | .586      | 4.88                                                 | .44       | 4.95                                                   | .22       |
| Language as connection          |                                              |           |                                                      |           |                                                        |           |
| Parents                         | 4.83                                         | .45       | 4.80                                                 | .50       | 4.52                                                   | .75       |
| Siblings                        | 4.40                                         | 1.01      | 4.56                                                 | .87       | 3.86                                                   | 1.35      |
| Other family members            | 4.83                                         | .51       | 4.92                                                 | .28       | 4.95                                                   | .22       |
| Friends                         | 3.81                                         | 1.19      | 3.72                                                 | 1.21      | 3.48                                                   | 1.40      |
| Community members               | 2.69                                         | 1.43      | 2.64                                                 | 1.50      | 2.95                                                   | 1.12      |
| Language as culture             |                                              |           |                                                      |           |                                                        |           |
| Child sense of belonging        | 2.78                                         | 1.12      | 3.12                                                 | 1.42      | 2.67                                                   | 1.11      |
| Child knowledge                 | 2.58                                         | 1.08      | 2.92                                                 | 1.12      | 2.81                                                   | 1.12      |
| Child attachment                | 2.39                                         | 1.13      | 2.64                                                 | 1.00      | 2.33                                                   | .91       |
| Child pride                     | 2.25                                         | 1.03      | 2.60                                                 | 1.12      | 2.52                                                   | .93       |
| Language as capital             |                                              |           |                                                      |           |                                                        |           |
| For School                      | 4.39                                         | .77       | 4.20                                                 | .82       | 4.05                                                   | .81       |
| For University                  | 4.64                                         | .64       | 4.52                                                 | .65       | 4.52                                                   | .60       |
| For Employment                  | 4.64                                         | .49       | 4.44                                                 | .71       | 4.24                                                   | .70       |
| Pro Hebrew                      |                                              |           |                                                      |           |                                                        |           |
| Language status                 |                                              |           |                                                      |           |                                                        |           |
| Parent opinion                  | 4.94                                         | .23       | 4.96                                                 | .20       | 4.86                                                   | .36       |
| Community opinion               | 4.92                                         | .28       | 4.92                                                 | .40       | 4.76                                                   | .63       |
| Israel opinion                  | 4.94                                         | .23       | 5.00                                                 | .00       | 5.00                                                   | .00       |
| World opinion                   | 2.47                                         | 1.12      | 2.56                                                 | 1.26      | 2.52                                                   | 1.21      |
| Language as connection (family) |                                              |           |                                                      |           |                                                        |           |
| Parents                         | 2.64                                         | 1.48      | 2.20                                                 | 1.26      | 2.00                                                   | 1.10      |
| Siblings                        | 2.71                                         | 1.27      | 2.60                                                 | 1.29      | 3.00                                                   | 1.14      |
| Other family members            | 3.33                                         | 1.55      | 2.57                                                 | 1.44      | 2.55 <sup>a</sup>                                      | 1.43      |
| Friends                         | 4.75                                         | .55       | 4.84                                                 | .47       | 4.81                                                   | .40       |
| Community members               | 4.89                                         | .40       | 4.84                                                 | .37       | 4.86                                                   | .36       |
| Language as culture             |                                              |           |                                                      |           |                                                        |           |
| Child sense of belonging        | 4.58                                         | .69       | 4.64                                                 | .70       | 4.90                                                   | .44       |
| Child knowledge                 | 4.81                                         | .47       | 4.88                                                 | .33       | 5.00                                                   | .00       |
| Child attachment                | 4.78                                         | .49       | 4.80                                                 | .58       | 4.90                                                   | .30       |
| Child pride                     | 4.81                                         | .47       | 4.88                                                 | .33       | 4.90                                                   | .30       |

|                                                               |                   |      |                   |      |                   |      |
|---------------------------------------------------------------|-------------------|------|-------------------|------|-------------------|------|
| Language as capital                                           |                   |      |                   |      |                   |      |
| For School                                                    | 4.86              | .54  | 5.00              | .00  | 5.00              | .00  |
| For University                                                | 4.78              | .64  | 4.96              | .20  | 4.90              | .30  |
| For Employment                                                | 4.61              | .77  | 4.92              | .28  | 4.76              | .70  |
| Management (Parent Questionnaire)                             |                   |      |                   |      |                   |      |
| Introducing Languages                                         |                   |      |                   |      |                   |      |
| Both at home together                                         | 2.36              | 1.38 | 1.88              | 1.27 | 2.19              | 1.54 |
| English at home; Hebrew out of the home                       | 4.19              | 1.28 | 4.56              | 1.12 | 4.67              | .91  |
| English at home, then Hebrew at home                          | 2.03              | 1.25 | 1.88              | 1.36 | 1.52              | .87  |
| One parent one language                                       | 1.92              | 1.44 | 1.36              | .907 | 1.24              | .89  |
| General language management                                   |                   |      |                   |      |                   |      |
| Child can speak any language at home                          | 3.86              | 1.36 | 3.40              | 1.29 | 3.76              | 1.58 |
| Child can mix languages                                       | 3.67              | 1.31 | 3.32              | 1.41 | 3.90              | 1.58 |
| Interaction strategies adopted if child speaks Hebrew at home |                   |      |                   |      |                   |      |
| Child to repeat in English                                    | 1.94              | 1.29 | 2.20              | 1.38 | 1.95              | 1.28 |
| Pretend not to understand                                     | 1.39              | .77  | 1.48              | 1.05 | 1.48              | .93  |
| Request clarification in English                              | 1.97              | 1.30 | 2.12              | 1.30 | 1.67              | .97  |
| Repeat back to child in English                               | 2.44              | 1.56 | 2.48              | 1.64 | 2.05              | 1.40 |
| Keep talking                                                  | 2.89              | 1.58 | 2.52              | 1.48 | 3.33              | 1.62 |
| Talk in Hebrew                                                | 1.78              | 1.20 | 1.32              | .690 | 1.67              | .86  |
| Promoting English language strategies                         |                   |      |                   |      |                   |      |
| With siblings                                                 | 3.03 <sup>b</sup> | 1.45 | 3.20              | 1.56 | 2.52              | 1.40 |
| With friends                                                  | 2.19              | .92  | 1.92              | .76  | 1.76              | .94  |
| With family not living at home                                | 3.86 <sup>b</sup> | 1.44 | 3.54 <sup>c</sup> | 1.56 | 3.95              | 1.53 |
| Television                                                    | 2.97 <sup>b</sup> | 1.29 | 2.48              | 1.39 | 2.10              | 1.09 |
| Promoting Hebrew language strategies                          |                   |      |                   |      |                   |      |
| With siblings                                                 | 1.89 <sup>b</sup> | 1.02 | 1.56              | .77  | 1.57              | .98  |
| With friends                                                  | 3.58              | 1.08 | 3.36              | 1.38 | 3.19              | 1.72 |
| With family not living at home                                | 2.20 <sup>b</sup> | 1.28 | 1.87 <sup>d</sup> | 1.29 | 1.29 <sup>e</sup> | 1.06 |
| Television                                                    | 2.51 <sup>b</sup> | 1.29 | 2.28              | 1.17 | 2.67              | 1.35 |
| Practice (Parent Questionnaire)                               |                   |      |                   |      |                   |      |
| Home English language use                                     |                   |      |                   |      |                   |      |
| Both parents speak                                            | 4.58              | .94  | 4.76              | .60  | 4.81              | .51  |
| Everyone speaks                                               | 4.36              | 1.02 | 4.60              | .71  | 4.48              | .98  |
| Child speaks                                                  | 4.47              | .70  | 4.76              | .52  | 4.57              | .98  |
| Child speaks with parent/s                                    | 4.42              | .77  | 4.72              | .54  | 4.29              | 1.15 |
| Home Hebrew language use                                      |                   |      |                   |      |                   |      |
| Both parents speak                                            | 1.94              | .98  | 1.72              | .98  | 2.14              | .96  |
| Everyone speaks                                               | 2.03              | 1.06 | 1.60              | .91  | 2.62              | 1.32 |
| Child speaks                                                  | 2.53              | 1.16 | 2.00              | 1.04 | 2.71              | 1.31 |
| Child speaks with parent/s                                    | 2.08              | 1.16 | 1.68              | .80  | 1.67              | .66  |
| Practice (Child Questionnaire)                                |                   |      |                   |      |                   |      |
| Home English language use                                     |                   |      |                   |      |                   |      |
| Both parents speak                                            | 4.36              | .90  | 4.64              | .57  | 4.67              | .48  |
| Everyone speaks                                               | 4.06              | 1.12 | 4.60              | .58  | 4.57              | .68  |
| I speak                                                       | 4.42 <sup>f</sup> | .83  | 4.20              | .91  | 4.10              | .94  |
| I speak with parent/s                                         | 4.55 <sup>f</sup> | .79  | 4.20              | 1.08 | 4.38              | .86  |
| Home Hebrew language use                                      |                   |      |                   |      |                   |      |
| Both parents speak                                            | 2.15 <sup>f</sup> | 1.03 | 1.92              | .70  | 1.71              | .90  |
| Everyone speaks                                               | 1.97 <sup>f</sup> | .98  | 1.64              | .64  | 1.86              | 1.01 |
| I speak                                                       | 2.30 <sup>f</sup> | .88  | 2.32              | .69  | 2.05              | .86  |
| I speak with parent/s                                         | 1.82 <sup>f</sup> | .81  | 1.72              | .74  | 1.76              | .89  |
| General language management                                   |                   |      |                   |      |                   |      |
| I can speak any language at home                              | 4.33              | 1.20 | 4.68              | .69  | 4.24              | 1.18 |

|                                                                 |                   |      |                   |      |      |      |
|-----------------------------------------------------------------|-------------------|------|-------------------|------|------|------|
| I can mix languages                                             | 3.78              | 1.57 | 4.20              | .82  | 4.43 | .60  |
| Promoting English language strategies                           |                   |      |                   |      |      |      |
| With siblings                                                   | 4.26 <sup>g</sup> | 1.14 | 3.88              | 1.13 | 4.29 | .85  |
| With friends                                                    | 3.00              | 1.29 | 3.12              | 1.17 | 3.14 | 1.06 |
| With family not living at home                                  | 3.83              | 1.48 | 4.13 <sup>c</sup> | .90  | 4.48 | 1.12 |
| Television                                                      | 4.28              | 1.21 | 4.16              | 1.21 | 4.81 | .68  |
| Promoting Hebrew language strategies                            |                   |      |                   |      |      |      |
| With siblings                                                   | 1.76 <sup>g</sup> | 1.07 | 2.40              | 1.04 | 2.38 | .97  |
| With friends                                                    | 3.25              | 1.30 | 3.48              | 1.12 | 3.57 | 1.12 |
| With family not living at home                                  | 2.2500            | 1.30 | 2.32              | .95  | 1.95 | 1.36 |
| Television                                                      | 2.0833            | 1.13 | 2.16              | 1.18 | 2.14 | 1.28 |
| Introducing languages                                           |                   |      |                   |      |      |      |
| Both at home together                                           | 2.24 <sup>f</sup> | 1.73 | 2.52 <sup>d</sup> | 1.68 | 2.48 | 1.50 |
| English at home; Hebrew out of the home                         | 4.03 <sup>g</sup> | 1.68 | 4.43 <sup>d</sup> | 1.38 | 4.29 | 1.23 |
| English at home, then Hebrew at home                            | 1.70 <sup>f</sup> | 1.38 | 1.67 <sup>c</sup> | 1.37 | 2.00 | 1.67 |
| One parent one language                                         | 2.11              | 1.67 | 1.40              | 1.00 | 1.33 | .86  |
| Interaction strategies parent/s adopt if I speak Hebrew at home |                   |      |                   |      |      |      |
| Asked to repeat in English                                      | 1.89              | 1.49 | 1.96              | 1.17 | 2.10 | 1.00 |
| Parent pretends not to understand                               | 1.06 <sup>b</sup> | .34  | 1.24              | .60  | 1.29 | .78  |
| Parent requests clarification in English                        | 1.49 <sup>b</sup> | 1.29 | 1.92              | 1.22 | 1.90 | 1.09 |
| Parent repeats in English                                       | 1.83              | 1.34 | 2.04              | .98  | 2.19 | 1.29 |
| Parent keeps talking                                            | 3.49 <sup>b</sup> | 1.70 | 3.04              | 1.51 | 3.14 | 1.68 |
| Parent talks in Hebrew                                          | 2.23 <sup>b</sup> | 1.29 | 1.63 <sup>h</sup> | 1.01 | 2.00 | .95  |

*Note.* Likert Scale (1= *not at all*, 5 = *very much*).

<sup>a</sup>*n* = 20; <sup>b</sup>*n* = 35; <sup>c</sup>*n* = 24; <sup>d</sup>*n* = 23; <sup>e</sup>*n* = 19; <sup>f</sup>*n* = 33; <sup>g</sup>*n* = 34; <sup>h</sup>*n* = 24

**Table S3***Age of Onset as a Categorical Variable: Overview of FLP*

|                                 | Early<br>(AOB 0-24)<br><i>n</i> = 56 |           | Middle<br>(AOB 25-48)<br><i>n</i> = 17 |           | Late<br>(AOB 49+)<br><i>n</i> = 9 |           |
|---------------------------------|--------------------------------------|-----------|----------------------------------------|-----------|-----------------------------------|-----------|
|                                 | <i>M</i>                             | <i>SD</i> | <i>M</i>                               | <i>SD</i> | <i>M</i>                          | <i>SD</i> |
| Ideology (Parent Questionnaire) |                                      |           |                                        |           |                                   |           |
| Benefits of bilingualism        |                                      |           |                                        |           |                                   |           |
| Cognitive                       | 4.57                                 | .68       | 4.82                                   | .53       | 4.67                              | .707      |
| Economic                        | 4.64                                 | .59       | 4.82                                   | .53       | 4.56                              | .53       |
| Social                          | 4.63                                 | .75       | 5.00                                   | .00       | 4.89                              | .33       |
| Pro English                     |                                      |           |                                        |           |                                   |           |
| Language status                 |                                      |           |                                        |           |                                   |           |
| Parent opinion                  | 4.96                                 | .19       | 4.88                                   | .33       | 5.00                              | .00       |
| Community opinion               | 4.45                                 | .81       | 4.41                                   | .80       | 4.56                              | .73       |
| Israel opinion                  | 4.57                                 | .63       | 4.53                                   | .51       | 4.78                              | .44       |
| World opinion                   | 4.79                                 | .49       | 4.76                                   | .56       | 5.00                              | .00       |
| Language as connection          |                                      |           |                                        |           |                                   |           |
| Parents                         | 4.71                                 | .59       | 4.88                                   | .33       | 4.67                              | .71       |
| Siblings                        | 4.22 <sup>a</sup>                    | 1.13      | 4.53                                   | .94       | 4.44                              | 1.13      |
| Other family members            | 4.89                                 | .37       | 4.82                                   | .53       | 5.00                              | .00       |
| Friends                         | 3.57                                 | 1.29      | 3.94                                   | 1.20      | 4.00                              | 1.00      |
| Community members               | 2.68                                 | 1.49      | 2.82                                   | 1.24      | 3.00                              | .71       |
| Language as culture             |                                      |           |                                        |           |                                   |           |
| Child sense of belonging        | 2.77                                 | 1.24      | 3.29                                   | 1.36      | 2.56                              | .53       |
| Child knowledge                 | 2.75                                 | 1.13      | 2.76                                   | .970      | 2.67                              | 1.23      |
| Child attachment                | 2.34                                 | 1.07      | 2.71                                   | 1.11      | 2.67                              | .50       |
| Child pride                     | 2.25                                 | 1.01      | 2.76                                   | 1.15      | 2.89                              | .60       |
| Language as capital             |                                      |           |                                        |           |                                   |           |
| For School                      | 4.30                                 | .78       | 4.24                                   | .83       | 3.89                              | .78       |
| For University                  | 4.63                                 | .56       | 4.41                                   | .80       | 4.56                              | .73       |
| For Employment                  | 4.50                                 | .63       | 4.47                                   | .72       | 4.33                              | .50       |
| Pro Hebrew                      |                                      |           |                                        |           |                                   |           |
| Language status                 |                                      |           |                                        |           |                                   |           |
| Parent opinion                  | 4.93                                 | .26       | 4.94                                   | .24       | 4.89                              | .33       |
| Community opinion               | 4.91                                 | .35       | 5.00                                   | .00       | 4.44                              | .88       |
| Israel opinion                  | 4.96                                 | .19       | 5.00                                   | .00       | 5.00                              | .00       |
| World opinion                   | 2.43                                 | 1.14      | 2.71                                   | 1.31      | 2.67                              | 1.12      |
| Language as connection          |                                      |           |                                        |           |                                   |           |
| Parents                         | 2.36                                 | 1.45      | 2.24                                   | 1.03      | 2.44                              | 1.24      |
| Siblings                        | 2.76 <sup>a</sup>                    | 1.25      | 2.59                                   | 1.23      | 3.00                              | 1.32      |
| Other family members            | 3.05 <sup>a</sup>                    | 1.57      | 2.88 <sup>c</sup>                      | 1.50      | 2.00                              | .93       |
| Friends                         | 4.77                                 | .54       | 4.94                                   | .24       | 4.67                              | .50       |
| Community members               | 4.84                                 | .42       | 5.00                                   | .00       | 4.78                              | .44       |
| Language as culture             |                                      |           |                                        |           |                                   |           |
| Child sense of belonging        | 4.70                                 | .63       | 4.59                                   | .71       | 4.78                              | .67       |
| Child knowledge                 | 4.86                                 | .40       | 4.88                                   | .33       | 5.00                              | .00       |
| Child attachment                | 4.82                                 | .47       | 4.76                                   | .56       | 4.89                              | .33       |
| Child pride                     | 4.84                                 | .42       | 4.88                                   | .33       | 4.89                              | .33       |

|                                                               |                   |       |                   |      |                   |      |
|---------------------------------------------------------------|-------------------|-------|-------------------|------|-------------------|------|
| Language as capital                                           |                   |       |                   |      |                   |      |
| For School                                                    | 4.95              | .40   | 4.88              | .33  | 5.00              | .00  |
| For University                                                | 4.91              | .44   | 4.76              | .56  | 4.78              | .44  |
| For Employment                                                | 4.75              | .61   | 4.82              | .53  | 4.56              | 1.01 |
| Management (Parent Questionnaire)                             |                   |       |                   |      |                   |      |
| Introducing Languages                                         |                   |       |                   |      |                   |      |
| Both at home together                                         | 2.63              | 1.45  | 1.24              | .44  | 1.11              | .33  |
| English at home; Hebrew out of the home                       | 4.20              | 1.33  | 4.94              | .24  | 4.89              | .33  |
| English at home, then Hebrew at home                          | 1.98              | 1.18  | 1.65              | 1.37 | 1.44              | 1.01 |
| One parent one language                                       | 1.66              | 1.31  | 1.59              | 1.06 | 1.00              | .00  |
| General language management                                   |                   |       |                   |      |                   |      |
| Child can speak any language at home                          | 3.61              | 1.41  | 3.82              | 1.29 | 4.00              | 1.58 |
| Child can mix languages                                       | 3.45              | 1.41  | 4.06              | 1.20 | 3.89              | 1.69 |
| Interaction strategies adopted if child speaks Hebrew at home |                   |       |                   |      |                   |      |
| Child to repeat in English                                    | 2.11              | 1.36  | 1.71              | .85  | 2.11              | 1.69 |
| Pretend not to understand                                     | 1.48              | .95   | 1.41              | .87  | 1.22              | .44  |
| Request clarification in English                              | 1.89              | 1.17  | 2.12              | 1.36 | 1.89              | 1.36 |
| Repeat back to child in English                               | 2.50              | 1.595 | 1.94              | 1.30 | 2.22              | 1.56 |
| Keep talking                                                  | 2.84              | 1.54  | 2.88              | 1.62 | 3.22              | 1.86 |
| Talk in Hebrew                                                | 1.64              | 1.09  | 1.41              | .62  | 1.78              | .97  |
| Promoting English language strategies                         |                   |       |                   |      |                   |      |
| With siblings                                                 | 3.00 <sup>a</sup> | 1.45  | 2.71              | 1.57 | 3.11              | 1.54 |
| With friends                                                  | 2.05              | .90   | 2.00              | .87  | 1.67              | .87  |
| With family not living at home                                | 3.76 <sup>b</sup> | 1.50  | 3.47              | 1.59 | 4.56              | 1.01 |
| Television                                                    | 2.69 <sup>a</sup> | 1.33  | 2.24              | 1.30 | 2.67              | 1.22 |
| Promoting Hebrew language strategies                          |                   |       |                   |      |                   |      |
| With siblings                                                 | 1.78 <sup>a</sup> | .99   | 1.65              | .93  | 1.33              | .50  |
| With friends                                                  | 3.41              | 1.29  | 3.35              | 1.50 | 3.56              | 1.59 |
| With family not living at home                                | 2.23 <sup>a</sup> | 1.32  | 1.47 <sup>f</sup> | .74  | 1.00 <sup>g</sup> | .00  |
| Television                                                    | 2.56 <sup>a</sup> | 1.21  | 2.06              | 1.25 | 2.78              | 1.56 |
| Practice (Parent Questionnaire)                               |                   |       |                   |      |                   |      |
| Home English language use                                     |                   |       |                   |      |                   |      |
| Both parents speak                                            | 4.63              | .84   | 4.82              | .53  | 4.89              | .33  |
| Everyone speaks                                               | 4.41              | .93   | 4.65              | .61  | 4.44              | 1.33 |
| Child speaks                                                  | 4.57              | .66   | 4.71              | .59  | 4.44              | 1.33 |
| Child speaks with parent/s                                    | 4.48              | .71   | 4.71              | .59  | 4.00              | 1.58 |
| Home Hebrew language use                                      |                   |       |                   |      |                   |      |
| Both parents speak                                            | 2.02              | 1.00  | 1.59              | .870 | 2.00              | 1.00 |
| Everyone speaks                                               | 2.07              | 1.13  | 1.82              | 1.13 | 2.33              | 1.32 |
| Child speaks                                                  | 2.52              | 1.19  | 2.18              | 1.13 | 2.22              | 1.30 |
| Child speaks with parent/s                                    | 2.02              | 1.04  | 1.53              | .72  | 1.44              | .53  |
| Practice (Child Questionnaire)                                |                   |       |                   |      |                   |      |
| Home English language use                                     |                   |       |                   |      |                   |      |
| Both parents speak                                            | 4.43              | .81   | 4.65              | .49  | 4.89              | .33  |
| Everyone speaks                                               | 4.27              | .98   | 4.41              | .80  | 4.78              | .44  |
| I speak                                                       | 4.28 <sup>b</sup> | .92   | 4.19 <sup>e</sup> | .91  | 4.33              | .71  |
| I speak with parent/s                                         | 4.30 <sup>b</sup> | .98   | 4.50 <sup>e</sup> | .82  | 4.78              | .44  |
| Home Hebrew language use                                      |                   |       |                   |      |                   |      |
| Both parents speak                                            | 2.00 <sup>b</sup> | .95   | 2.00 <sup>e</sup> | .73  | 1.67              | 1.00 |
| Everyone speaks                                               | 1.83 <sup>b</sup> | .95   | 1.94 <sup>e</sup> | .68  | 1.67              | 1.00 |
| I speak                                                       | 2.35 <sup>b</sup> | .83   | 2.13 <sup>e</sup> | .81  | 1.78              | .67  |
| I speak with parent/s                                         | 1.85 <sup>b</sup> | .83   | 1.69 <sup>e</sup> | .70  | 1.44              | .73  |
| General language management                                   |                   |       |                   |      |                   |      |
| I can speak any language at home                              | 4.43              | 1.16  | 4.29              | .92  | 4.56              | .73  |

|                                                                 |                   |      |                   |      |      |      |
|-----------------------------------------------------------------|-------------------|------|-------------------|------|------|------|
| I can mix languages                                             | 4.18              | 1.16 | 3.47              | 1.37 | 4.56 | .53  |
| Promoting English language strategies                           |                   |      |                   |      |      |      |
| With siblings                                                   | 4.07 <sup>b</sup> | 1.18 | 4.29              | .77  | 4.33 | .87  |
| With friends                                                    | 3.00              | 1.26 | 3.00              | .94  | 3.67 | 1.00 |
| With family not living at home                                  | 3.87 <sup>a</sup> | 1.31 | 4.29              | 1.21 | 5.00 | .00  |
| Television                                                      | 4.38              | 1.10 | 4.29              | 1.10 | 4.56 | 1.33 |
| Promoting Hebrew language strategies                            |                   |      |                   |      |      |      |
| With siblings                                                   | 2.17 <sup>b</sup> | 1.13 | 1.76              | .90  | 2.56 | .88  |
| With friends                                                    | 3.36              | 1.29 | 3.65              | .93  | 3.22 | 1.09 |
| With family not living at home                                  | 2.34              | 1.24 | 2.06              | 1.14 | 1.56 | 1.01 |
| Television                                                      | 2.29              | 1.22 | 1.94              | 1.09 | 1.44 | .73  |
| Introducing languages                                           |                   |      |                   |      |      |      |
| Both at home together                                           | 2.78 <sup>c</sup> | 1.76 | 1.82              | 1.19 | 1.22 | .44  |
| English at home; Hebrew out of the home                         | 3.94 <sup>d</sup> | 1.69 | 4.76              | .75  | 4.78 | .44  |
| English at home, then Hebrew at home                            | 1.87 <sup>d</sup> | 1.51 | 1.53              | 1.33 | 1.67 | 1.41 |
| One parent one language                                         | 1.89              | 1.49 | 1.41              | 1.06 | 1.00 | .00  |
| Interaction strategies parent/s adopt if I speak Hebrew at home |                   |      |                   |      |      |      |
| Asked to repeat in English                                      | 1.84              | 1.23 | 2.35              | 1.50 | 2.00 | 1.00 |
| Parent pretends not to understand                               | 1.22 <sup>a</sup> | .63  | 1.00              | .00  | 1.22 | .67  |
| Parent requests clarification in English                        | 1.62 <sup>a</sup> | 1.16 | 1.94              | 1.34 | 2.00 | 1.41 |
| Parent repeats in English                                       | 1.96              | 1.28 | 2.00              | 1.17 | 2.11 | 1.05 |
| Parent keeps talking                                            | 3.22 <sup>a</sup> | 1.67 | 2.88              | 1.69 | 4.22 | .83  |
| Parent talks in Hebrew                                          | 2.05 <sup>a</sup> | 1.18 | 1.81 <sup>e</sup> | 1.11 | 1.89 | 1.05 |

*Note.* Likert Scale (1= *not at all*, 5 = *very much*).

<sup>a</sup>*n* = 55; <sup>b</sup>*n* = 54; <sup>c</sup>*n* = 51; <sup>d</sup>*n* = 52; <sup>e</sup>*n* = 16; <sup>f</sup>*n* = 15; <sup>g</sup>*n* = 7



**Table S4**

*Correlations Between Chronological Age and Family Language Policy Components (Ideology, Management, and Practice)- Significant Models Only*

| Measure ( <i>n</i> = 82)                                   | <i>M</i> | <i>SD</i> | Quartiles<br>1,3 | 1     | 2      | 3     | 4   | 5  |
|------------------------------------------------------------|----------|-----------|------------------|-------|--------|-------|-----|----|
| Ideology and CA via Parent Questionnaire                   |          |           |                  |       |        |       |     |    |
| 1. CA (months)                                             | 107.76   | 39.20     | 69.00, 157.00    |       |        |       |     |    |
| 2. Israel opinion (English) <sup>a</sup>                   | 4.59     | .59       | 4.00, 5.00       | .26*  | --     |       |     |    |
| 3. School (English) <sup>b</sup>                           | 4.24     | .79       | 4.00, 5.00       | -.23* | .30**  | --    |     |    |
| 4. Employment (English) <sup>b</sup>                       | 4.48     | .63       | 4.00, 5.00       | -.23* | .15    | .51** | --  |    |
| 5. Child sense of belonging (Israel) <sup>c</sup>          | 4.68     | .65       | 5.00, 5.00       | .22*  | .24*   | .14   | .06 | -- |
| Management and CA via Parent Questionnaire                 |          |           |                  |       |        |       |     |    |
| 1. CA (months)                                             | 107.76   | 39.20     | 69.00, 157.00    | --    |        |       |     |    |
| 2. One parent one language <sup>d</sup>                    | 1.57     | 1.20      | 1.00, 1.00       | -.26* | --     |       |     |    |
| 3. TV in English <sup>e h</sup>                            | 2.59     | 1.31      | 1.00, 4.00       | -.27* | .164   | --    |     |    |
| Practice and CA via Child Questionnaire                    |          |           |                  |       |        |       |     |    |
| 1. CA (months)                                             | 107.76   | 39.20     | 69.00, 157.00    |       |        |       |     |    |
| 2. Everyone speaks English <sup>f</sup>                    | 4.35     | .91       | 4.00, 5.00       | .22*  | --     |       |     |    |
| 3. Parent requests clarification in English <sup>g h</sup> | 1.73     | 1.22      | 1.00, 2.00       | .27*  | .26*   | --    |     |    |
| 4. Hebrew with siblings <sup>e i</sup>                     | 2.13     | 1.07      | 1.00, 3.00       | .28*  | -.31** | .20   | --  |    |

*Note.* CA = chronological age; <sup>a</sup>language status; <sup>b</sup>language as capital; <sup>c</sup>language as connection;

<sup>d</sup>introducing languages; <sup>e</sup>promoting language strategies; <sup>f</sup>language use; <sup>g</sup>interaction strategies parent/s

adopt if child speaks Hebrew at home; <sup>h</sup> *n* = 81; <sup>i</sup> *n* = 80.

\*Correlation at 0.05 level (2-tailed) \*\*Correlation at the 0.01 level (2-tailed).

**Table S5**

*Correlations Between Age of Onset of Bilingualism and Family Language Policy Components  
(Ideology, Management, and Practice) - Significant Models Only*

| Measure ( <i>n</i> = 82)                                                 | <i>M</i> | <i>SD</i> | Quartiles<br>1,3 | 1      | 2      | 3      | 4      | 5     | 6      | 7  | 8 |
|--------------------------------------------------------------------------|----------|-----------|------------------|--------|--------|--------|--------|-------|--------|----|---|
| Ideology and AOB via Parent Questionnaire                                |          |           |                  |        |        |        |        |       |        |    |   |
| 1. AOB (months)                                                          | 21.51    | 28.24     | 0, 35.25         | --     |        |        |        |       |        |    |   |
| 2. Social benefits <sup>a</sup>                                          | 4.73     | .65       | 5.00, 5.00       | .33**  | --     |        |        |       |        |    |   |
| 3. Speak with siblings in English <sup>b g</sup>                         | 4.31     | 1.09      | 3.50, 5.00       | .29**  | .27*   | --     |        |       |        |    |   |
| 4. Speak with friends in English <sup>b</sup>                            | 3.70     | 1.24      | 3.00, 5.00       | .22*   | .21    | .51**  | --     |       |        |    |   |
| 5. Child attachment to English speaking country <sup>c</sup>             | 2.45     | 1.03      | 2.00, 3.00       | .24*   | .08    | .21    | .16    | --    |        |    |   |
| 6. Child pride for English speaking country <sup>c</sup>                 | 2.43     | 1.03      | 2.00, 3.00       | .34**  | .14    | .23*   | .31**  | .76** | --     |    |   |
| 7. Speak with other family members in Hebrew <sup>b h</sup>              | 2.91     | 1.52      | 1.00, 4.00       | -.23*  | .03    | -.20   | .09    | -.18  | -.12   | -- |   |
| Management and AOB via Parent Questionnaire                              |          |           |                  |        |        |        |        |       |        |    |   |
| 1. AOB (months)                                                          | 21.51    | 28.24     | 0, 35.25         | --     |        |        |        |       |        |    |   |
| 2. Both languages at home together <sup>d</sup>                          | 2.17     | 1.39      | 1.00, 3.00       | -.58** | --     |        |        |       |        |    |   |
| 3. English at home; Hebrew out of the home <sup>d</sup>                  | 4.43     | 1.16      | 4.00, 5.00       | .52**  | -.48** | --     |        |       |        |    |   |
| 4. English at home, then Hebrew at home <sup>d</sup>                     | 1.85     | 1.21      | 1.00, 2.00       | -.31** | .23*   | -.40** | --     |       |        |    |   |
| 5. One parent one language <sup>d</sup>                                  | 1.57     | 1.20      | 1.00, 1.00       | -.26*  | .19    | -.48** | .27*   | --    |        |    |   |
| 6. Play with siblings in Hebrew <sup>c g</sup>                           | 1.70     | .94       | 1.00, 2.00       | -.24*  | .32**  | -.15   | .07    | .18   | --     |    |   |
| 7. Hebrew with family not living at home <sup>e i</sup>                  | 1.97     | 1.24      | 1.00, 3.00       | -.45** | .32**  | -.39** | .08    | .24*  | .49**  | -- |   |
| Language Use (Subcomponent of Practice) and AOB via Parent Questionnaire |          |           |                  |        |        |        |        |       |        |    |   |
| 1. AOB (months)                                                          | 21.51    | 28.24     | 0, 35.25         |        |        |        |        |       |        |    |   |
| 2. Both parents speak English                                            | 4.70     | .75       | 5.00, 5.00       | .29**  |        |        |        |       |        |    |   |
| 3. Everyone speaks English                                               | 4.46     | .92       | 4.00, 5.00       | .33**  | .59**  |        |        |       |        |    |   |
| 4. Child speaks English with parents                                     | 4.48     | .84       | 4.00, 5.00       | .28**  | .38**  | .60**  | --     |       |        |    |   |
| 5. Child speaks Hebrew                                                   | 2.41     | 1.19      | 1.75, 3.00       | -.32** | -.38** | -.31** | -.43** | --    |        |    |   |
| 6. Child speaks Hebrew with parents                                      | 1.85     | .96       | 1.00, 2.00       | -.35** | -.40** | -.29** | -.42** | .73** | --     |    |   |
| Language Use (Subcomponent of Practice) and AOB via Child Questionnaire  |          |           |                  |        |        |        |        |       |        |    |   |
| 1. AOB (months)                                                          | 21.51    | 28.24     | 0, 35.25         | --     |        |        |        |       |        |    |   |
| 2. Both parents speak English                                            | 4.52     | .72       | 4.00, 5.00       | .28*   | --     |        |        |       |        |    |   |
| 3. Everyone speaks English                                               | 4.35     | .91       | 4.00, 5.00       | .28*   | .45**  | --     |        |       |        |    |   |
| 4. Child speaks English with parents <sup>h</sup>                        | 4.39     | .91       | 4.00, 5.00       | .25*   | .19    | .22    | --     |       |        |    |   |
| 5. Child speaks Hebrew <sup>h</sup>                                      | 2.24     | .82       | 2.00, 3.00       | -.23*  | -.41** | -.48** | -.34** | --    |        |    |   |
| 6. Child speaks Hebrew with parents <sup>h</sup>                         | 1.77     | .80       | 1.00, 2.00       | -.25*  | -.36** | -.47** | -.33** | .66** | --     |    |   |
| Other Subcomponents of Practice and AOB via Child Questionnaire          |          |           |                  |        |        |        |        |       |        |    |   |
| 1. AOB (months)                                                          | 21.51    | 28.24     | 0, 35.25         | --     |        |        |        |       |        |    |   |
| 2. Both languages at home together <sup>d i</sup>                        | 2.39     | 1.64      | 1.00, 4.00       | -.49** | --     |        |        |       |        |    |   |
| 3. English at home; Hebrew out of the home <sup>d j</sup>                | 4.22     | 1.47      | 4.00, 5.00       | .37**  | -.41** | --     |        |       |        |    |   |
| 4. One parent one language <sup>d</sup>                                  | 1.77     | 1.45      | 1.00, 2.00       | -.47** | .24*   | -.37** | --     |       |        |    |   |
| 5. Talk in Hebrew <sup>f k</sup>                                         | 1.99     | 1.14      | 1.00, 3.00       | -.30** | .25*   | -.38** | .36**  | --    |        |    |   |
| 6. English with family not living at home <sup>e g</sup>                 | 4.09     | 1.26      | 3.00, 5.00       | .36**  | -.15   | .20    | -.59** | -.22  | --     |    |   |
| 7. Hebrew with family not living at home <sup>e</sup>                    | 2.20     | 1.21      | 1.00, 3.00       | -.32** | .23*   | -.10   | .39**  | .25*  | -.52** | -- |   |

|    |                                 |      |      |            |        |       |      |      |       |      |       |   |
|----|---------------------------------|------|------|------------|--------|-------|------|------|-------|------|-------|---|
| 8. | Watch TV in Hebrew <sup>c</sup> | 2.12 | 1.17 | 1.00, 3.00 | -.35** | .30** | -.13 | .26* | .29** | -.17 | .29** | - |
|----|---------------------------------|------|------|------------|--------|-------|------|------|-------|------|-------|---|

*Note.* AOB = age of onset of bilingualism; <sup>a</sup>benefits of bilingualism; <sup>b</sup>language as connection; <sup>c</sup>language as culture; <sup>d</sup>introducing languages; <sup>e</sup>promoting language strategies; <sup>f</sup>interaction strategies parent/s adopt if child speaks Hebrew at home. <sup>g</sup>*n* = 81; <sup>h</sup>*n* = 79; <sup>i</sup>*n* = 77; <sup>j</sup>*n* = 78; <sup>k</sup>*n* = 80.

\*Correlation at the 0.05 level (2-tailed). \*\*Correlation at the 0.01 level (2-tailed).
